# Supplementary material for: SIDT2 RNA transporter promotes lung and gastrointestinal tumor development
Source: bioRxiv or medRxiv preprint supplement (doi:10.1101/724237), 2019-08-09

# Supplemental Figure 3

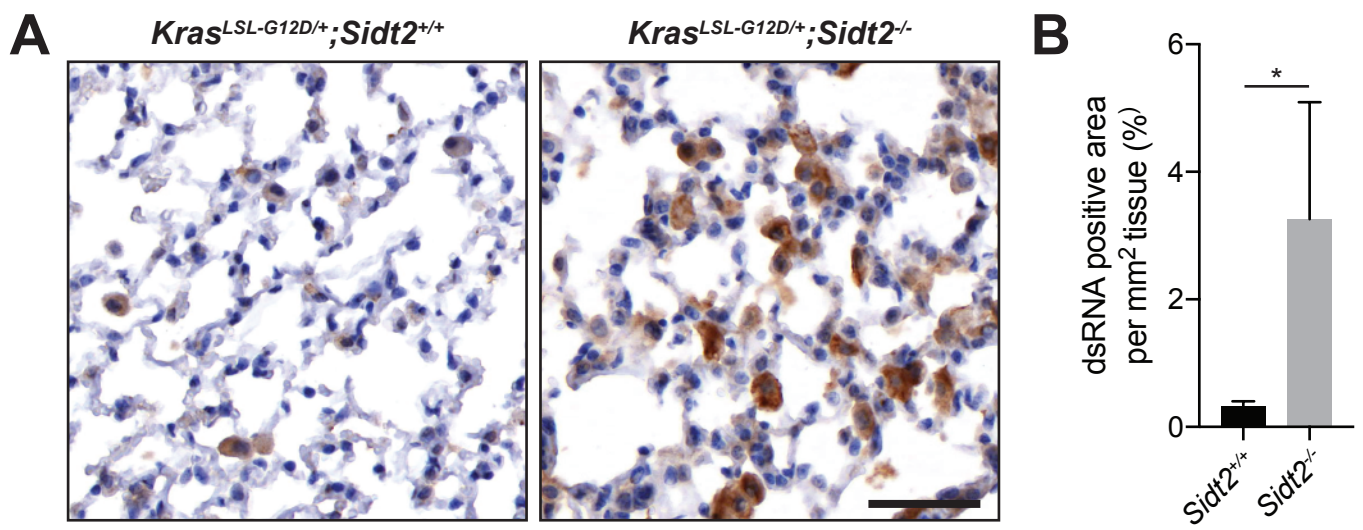

Supplement: Supplementary file [file media-3.pdf]
